# Supplementary material for: A new and very spiny lizard (Gymnophthalmidae: Echinosaura ) from the Andes in northwestern Ecuador
Source: PeerJ journal article supplement (doi:10.7717/peerj.12523), 2021-12-10

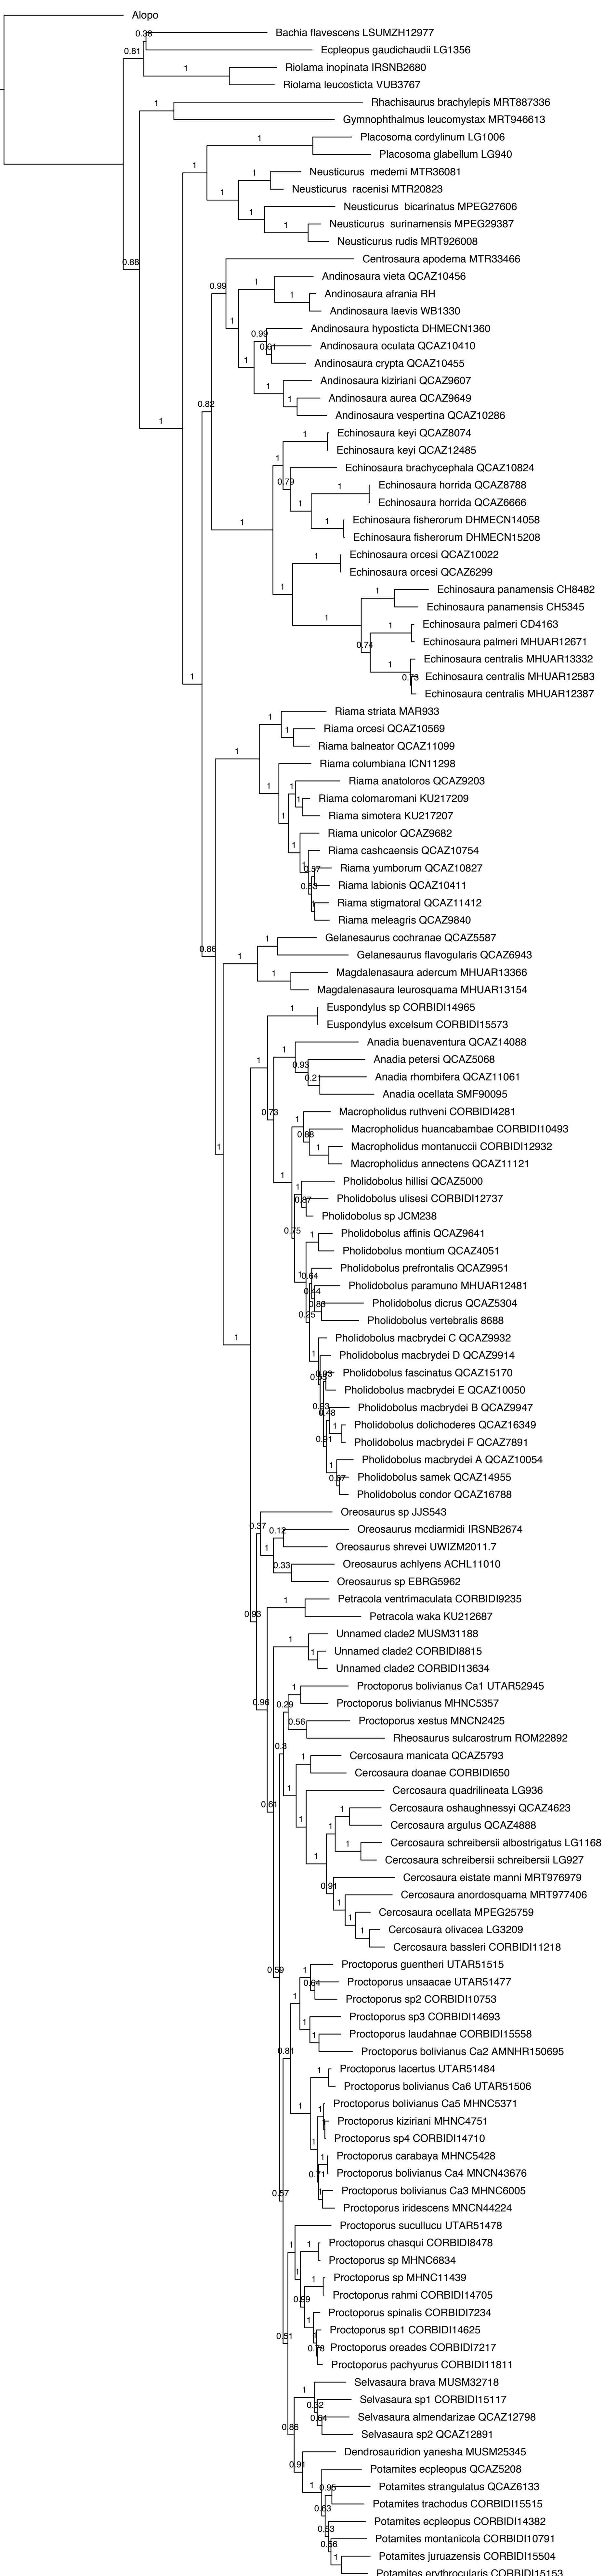

Supplement: Supplemental_Figure_S3.pdf [file Supplemental_Figure_S3.pdf]
